# Supplementary material for: Underdiagnosis and Undertreatment of Modifiable Cardiovascular Risk Factors Among Survivors of Childhood Cancer
Source: PubMed Central journal article supplement — J Am Heart Assoc. 2022 Jun 8;11(12):e024735. doi: 10.1161/JAHA.121.024735 (PMC9238650; doi:10.1161/jaha.121.024735), 2022-06-08
Supplement: JAH3-11-e024735-s001.pdf [file JAH3-11-e024735-s001.pdf]

# **SUPPLEMENTAL MATERIAL**

**TABLE S1. Characteristics and physiologic measurements of childhood cancer survivors at high cardiovascular disease risk by original cancer diagnosis.**

| Characteristics and measurements*              | Acute lymphoblastic leukemia<br>N=146 | Other leukemia<br>N=50 | Bone cancer / sarcoma<br>N=86 | Central nervous system<br>N=59 | Hodgkin lymphoma<br>N=95 | Non-Hodgkin lymphoma<br>N=47 | Kidney<br>N=55      | Neuroblastoma<br>N=33 |
|------------------------------------------------|---------------------------------------|------------------------|-------------------------------|--------------------------------|--------------------------|------------------------------|---------------------|-----------------------|
| Female sex (%)                                 | 79 (54.1%)                            | 35 (70.0%)             | 54 (62.8%)                    | 28 (47.5%)                     | 47 (49.5%)               | 22 (46.8%)                   | 38 (69.1%)          | 22 (66.7%)            |
| White non-Hispanic race/ethnicity (%)          | 122 (83.6%)                           | 42 (84.0%)             | 72 (83.7%)                    | 53 (89.8%)                     | 78 (82.1%)               | 43 (91.5%)                   | 48 (87.3%)          | 28 (84.8%)            |
| Median current age, y (range)                  | 38.3<br>(21.5-62.5)                   | 35.6<br>(21.6-59.4)    | 40.3<br>(20.1-59.4)           | 34.5<br>(23.8-55.2)            | 42.9<br>(26.9-65.0)      | 38.1<br>(27.4-58.3)          | 33.4<br>(22.1-56.2) | 31.7<br>(20.4-42.4)   |
| Median cancer diagnosis age, y (range)         | 4.9<br>(0.2-19.7)                     | 6.8<br>(0.1-17.3)      | 13.5<br>(0.2-20.1)            | 8.8<br>(0.5-16.2)              | 14.2<br>(3.4-20.8)       | 9.8<br>(1.4-18.6)            | 3.7<br>(0.5-17.3)   | 0.9<br>(0.0-17.6)     |
| Chest radiation exposure (%)                   | 32 (22.1%)                            | 16 (32.0%)             | 17 (20.0%)                    | 59 (100.0%)                    | 73 (76.8%)               | 9 (19.1%)                    | 23 (42.6%)          | 16 (48.5%)            |
| History of hypertension (%)                    | 37 (25.3%)                            | 17 (34.0%)             | 25 (29.1%)                    | 14 (23.7%)                     | 27 (28.4%)               | 12 (25.5%)                   | 12 (21.8%)          | 9 (27.3%)             |
| Currently on medications                       | 24 (64.9%)                            | 10 (58.8%)             | 20 (80.0%)                    | 9 (64.3%)                      | 21 (77.8%)               | 9 (75.0%)                    | 7 (58.3%)           | 3 (33.3%)             |
| History of dyslipidemia (%)                    | 53 (36.3%)                            | 18 (36.0%)             | 32 (37.2%)                    | 23 (39.0%)                     | 34 (35.8%)               | 11 (23.4%)                   | 14 (25.5%)          | 6 (18.2%)             |
| Currently on medications                       | 23 (43.4%)                            | 8 (44.4%)              | 11 (34.4%)                    | 9 (39.1%)                      | 19 (55.9%)               | 4 (36.4%)                    | 3 (21.4%)           | 3 (50.0%)             |
| History of diabetes (%)                        | 14 (9.6%)                             | 6 (12.0%)              | 7 (8.1%)                      | 2 (3.4%)                       | 7 (7.4%)                 | 5 (10.6%)                    | 7 (12.7%)           | 4 (12.1%)             |
| Currently on medications                       | 10 (71.4%)                            | 4 (66.7%)              | 5 (71.4%)                     | 2 (100.0%)                     | 6 (85.7%)                | 3 (60.0%)                    | 4 (57.1%)           | 3 (75.0%)             |
| Lifestyle factors (%)                          |                                       |                        |                               |                                |                          |                              |                     |                       |
| Physically active <sup>†</sup>                 | 110 (75.3%)                           | 34 (68.0%)             | 56 (65.1%)                    | 36 (61.0%)                     | 63 (66.3%)               | 32 (68.1%)                   | 39 (70.9%)          | 20 (60.6%)            |
| ≥5 cups daily fruits/vegetables                | 31 (21.2%)                            | 8 (16.0%)              | 12 (14.0%)                    | 11 (18.6%)                     | 21 (22.1%)               | 11 (23.4%)                   | 21 (38.2%)          | 5 (15.2%)             |
| Current smoking/tobacco use                    | 15 (10.3%)                            | 6 (12.0%)              | 4 (4.7%)                      | 4 (6.8%)                       | 10 (10.5%)               | 1 (2.1%)                     | 6 (10.9%)           | 2 (6.1%)              |
| Healthcare utilization (%)                     |                                       |                        |                               |                                |                          |                              |                     |                       |
| Health insurance coverage                      | 133 (91.1%)                           | 45 (90.0%)             | 85 (98.8%)                    | 57 (96.6%)                     | 85 (89.5%)               | 43 (91.5%)                   | 53 (96.4%)          | 32 (97.0%)            |
| Routine check-up within 1-2 years <sup>‡</sup> | 127 (87.0%)                           | 44 (88.0%)             | 79 (91.9%)                    | 57 (96.6%)                     | 87 (91.6%)               | 40 (85.1%)                   | 52 (94.5%)          | 31 (93.9%)            |
| History of survivorship clinic attendance      | 70 (51.5%)                            | 28 (62.2%)             | 42 (51.2%)                    | 23 (43.4%)                     | 32 (36.8%)               | 24 (53.3%)                   | 26 (50.0%)          | 17 (56.7%)            |
| BMI, kg/m <sup>2</sup>                         | 28.3 (6.4)                            | 26.1 (5.7)             | 26.3 (5.7)                    | 27.1 (7.1)                     | 27.6 (5.7)               | 27.8 (6.9)                   | 26.7 (5.3)          | 29.4 (9.6)            |
| No. overweight 25-29 kg/m <sup>2</sup> (%)     | 44 (30.1%)                            | 12 (24.0%)             | 37 (43.0%)                    | 18 (30.5%)                     | 30 (31.6%)               | 16 (34.0%)                   | 15 (27.3%)          | 6 (18.2%)             |
| No. obese ≥30 kg/m <sup>2</sup> (%)            | 50 (34.2%)                            | 13 (26.0%)             | 13 (15.1%)                    | 13 (22.0%)                     | 30 (31.6%)               | 13 (27.7%)                   | 16 (29.1%)          | 12 (36.4%)            |
| Waist circumference, cm                        | 90.8 (16.6)                           | 87.0 (14.0)            | 88.7 (16.6)                   | 88.4 (15.3)                    | 91.3 (13.9)              | 88.8 (16.7)                  | 82.3 (11.5)         | 91.9 (17.3)           |
| No. with central adiposity (%) <sup>§</sup>    | 57 (39.0%)                            | 16 (32.0%)             | 23 (26.7%)                    | 21 (35.6%)                     | 30 (31.6%)               | 13 (27.7%)                   | 9 (16.4%)           | 13 (39.4%)            |
| Systolic blood pressure, mmHg                  | 113.8 (14.2)                          | 111.0 (8.0)            | 112.3 (12.3)                  | 114.0 (12.4)                   | 115.4 (13.5)             | 113.7 (11.2)                 | 112.0 (11.7)        | 115.3 (13.0)          |
| Diastolic blood pressure, mmHg                 | 73.9 (9.4)                            | 73.4 (7.2)             | 74.0 (8.7)                    | 72.8 (9.6)                     | 73.3 (8.8)               | 73.7 (9.2)                   | 73.4 (8.4)          | 73.2 (9.0)            |
| Total cholesterol, mg/dL                       | 184.0 (40.3)                          | 190.9 (38.5)           | 192.3 (44.9)                  | 202.8 (49.4)                   | 189.5 (35.7)             | 185.0 (36.9)                 | 178.3 (33.3)        | 172.9 (29.0)          |
| High density lipoprotein, mg/dL                | 49.9 (15.0)                           | 52.1 (15.2)            | 54.7 (19.4)                   | 48.7 (16.6)                    | 56.0 (19.8)              | 54.1 (20.8)                  | 52.9 (14.2)         | 48.5 (9.3)            |
| Low density lipoprotein, mg/dL                 | 101.2 (31.8)                          | 109.8 (34.6)           | 106.5 (36.3)                  | 119.2 (40.4)                   | 106.1 (30.6)             | 104.3 (31.3)                 | 99.2 (27.8)         | 99.9 (23.2)           |
| Triglyceride, mg/dL                            | 162.8 (127.4)                         | 151.9 (109.9)          | 162.8 (111.8)                 | 181.8 (162.2)                  | 147.4 (140.5)            | 152.6(164.6)                 | 135.8 (74.2)        | 123.0 (59.1)          |
| Blood glucose, mg/dL                           | 87.7 (29.3)                           | 92.2 (21.7)            | 92.5 (28.8)                   | 88.9 (26.1)                    | 93.9 (39.7)              | 92.4(20.5)                   | 88.1 (24.6)         | 92.2 (31.6)           |
| Hemoglobin A1c%                                | 5.6 (1.1)                             | 5.6 (0.8)              | 5.5 (0.7)                     | 5.5 (0.5)                      | 5.8 (1.0)                | 5.5 (0.8)                    | 5.6 (0.6)           | 5.6 (0.6)             |

\* Mean value (standard deviation) unless otherwise noted

<sup>†</sup> Reporting ≥150 minutes of moderate activity/week or ≥75 minutes of vigorous activity/week, or equivalent mixture of both

<sup>‡</sup> Defined as having had a check-up by a physician, physician assistant, or nurse practitioner within 1-2 years

<sup>§</sup> Males ≥102 cm or females ≥88 cm

**TABLE S2. Demographic and clinical characteristics of participating versus non-participating cancer survivors recruited from the Childhood Cancer Survivor Study (CCSS) cohort.**

| Characteristic (%)                                         | Participants           |                        | Non-participants<br>N=825 | Overall CCSS<br>cohort*<br>N=24,730 |
|------------------------------------------------------------|------------------------|------------------------|---------------------------|-------------------------------------|
|                                                            | All consented<br>N=766 | Complete data<br>N=571 |                           |                                     |
| Female sex                                                 | 428 (55.9%)            | 325 (56.9%)            | 365 (44.2%)               | 11,544 (46.7%)                      |
| White non-Hispanic race/ethnicity                          | 641 (83.7%)            | 486 (85.1%)            | 669 (81.1%)               | 20,233 (81.8%)                      |
| Median current age, years (range)                          | 37.3 (20.1-65.0)       | 37.7 (20.1-65.0)       | 37.7 (19.7-64.9)          | 40.8 (19.1-69.5)                    |
| Median age at cancer diagnosis, years (range)              | 8.6 (0.01-20.9)        | 8.3 (0.01-20.8)        | 7.3 (0.00-20.7)           | 6.8 (0.0-21.0)                      |
| Cancer diagnosis                                           |                        |                        |                           |                                     |
| Bone cancer / sarcoma                                      | 116 (15.1%)            | 86 (15.1%)             | 136 (16.5%)               | 3684 (14.9%)                        |
| Central nervous system                                     | 69 (9.0%)              | 59 (10.3%)             | 80 (9.7%)                 | 4173 (16.9%)                        |
| Kidney                                                     | 80 (10.4%)             | 55 (9.6%)              | 72 (8.7%)                 | 2233 (9.0%)                         |
| Leukemia                                                   | 251 (32.8%)            | 196 (34.3%)            | 255 (30.9%)               | 7699 (31.1%)                        |
| Lymphoma                                                   | 205 (26.7%)            | 142 (24.9%)            | 215 (26.0%)               | 5077 (20.5%)                        |
| Neuroblastoma                                              | 45 (5.9%)              | 33 (5.8%)              | 67 (8.1%)                 | 1864 (7.5%)                         |
| Anthracycline exposure                                     | 601 (78.9%)            | 441 (77.4%)            | 638 (78.1%)               | 10856 (48.1%)                       |
| Chest radiation exposure                                   | 315 (41.4%)            | 245 (43.1%)            | 329 (40.1%)               | 5430 (24.6%)                        |
| History of hypertension requiring medications <sup>†</sup> | 107 (14.0%)            | 79 (13.8%)             | 85 (10.3%)                | 2990 (12.1%)                        |
| History of dyslipidemia requiring medications <sup>†</sup> | 85 (11.1%)             | 70 (12.3%)             | 78 (9.5%)                 | 2108 (8.5%)                         |
| History of diabetes requiring medications <sup>†</sup>     | 29 (3.8%)              | 23 (4.0%)              | 33 (4.0%)                 | 1061 (4.3%)                         |
| History of tobacco use <sup>†</sup>                        | 252 (32.9%)            | 175 (30.6%)            | 280 (33.9%)               | 7958 (32.2%)                        |

\* Not known to be deceased as of January 1, 2019

<sup>†</sup> Based on responses to prior Childhood Cancer Survivor Study questionnaires

**TABLE S3. Physiologic measurements of childhood cancer survivors (CCSS) at high cardiovascular risk compared with the general population (NHANES), stratified by cardiovascular disease risk factor underdiagnosis and undertreatment status.**

| Outcomes*                                   | No underdiagnosis or undertreatment |                              |                      | Any underdiagnosis         |                             |                      | Any undertreatment         |                             |                      |
|---------------------------------------------|-------------------------------------|------------------------------|----------------------|----------------------------|-----------------------------|----------------------|----------------------------|-----------------------------|----------------------|
|                                             | CCSS<br>N=323 <sup>†</sup>          | NHANES<br>N=218 <sup>†</sup> | P-value <sup>‡</sup> | CCSS<br>N=155 <sup>†</sup> | NHANES<br>N=90 <sup>†</sup> | P-value <sup>‡</sup> | CCSS<br>N=120 <sup>†</sup> | NHANES<br>N=48 <sup>†</sup> | P-value <sup>‡</sup> |
| BMI, kg/m <sup>2</sup>                      | 26.2 (6.0)                          | 28.2 (7.2)                   | 0.01                 | 28.8 (6.9)                 | 30.7 (6.7)                  | 0.02                 | 29.4 (6.4)                 | 31.7 (7.0)                  | 0.14                 |
| No. overweight 25-29 kg/m <sup>2</sup> (%)  | 91 (28.2%)                          | 52 (23.9%)                   | 0.02                 | 61 (39.4%)                 | 33 (36.7%)                  | 0.06                 | 36 (30.0%)                 | 11 (22.9%)                  | 0.35                 |
| No. obese ≥30 kg/m <sup>2</sup> (%)         | 72 (22.3%)                          | 75 (34.4%)                   |                      | 49 (31.6%)                 | 40 (44.4%)                  |                      | 50 (41.7%)                 | 28 (58.3%)                  |                      |
| Waist circumference, cm                     | 85.7 (14.8)                         | 95.8 (17.0)                  | <0.001               | 93.1 (15.3)                | 103.8(15.2)                 | <0.001               | 94.6 (15.4)                | 107.7 (15.4)                | <0.001               |
| No. with central adiposity (%) <sup>§</sup> | 90 (27.9%)                          | 109 (50.0%)                  | <0.001               | 56 (36.1%)                 | 54 (60.0%)                  | <0.001               | 50 (41.7%)                 | 34 (70.8%)                  | 0.001                |
| Systolic blood pressure, mmHg               | 109.7 (10.2)                        | 112.3 (9.1)                  | 0.001                | 118.7 (11.9)               | 126.0 (13.8)                | <0.001               | 118.9 (15.2)               | 131.5 (17.8)                | <0.001               |
| Diastolic blood pressure, mmHg              | 70.6 (7.0)                          | 66.9 (8.9)                   | <0.001               | 79.4 (8.4)                 | 74.6 (12.7)                 | <0.001               | 75.9 (10.3)                | 78.3(11.2)                  | 0.26                 |
| Total cholesterol, mg/dL                    | 177.5 (30.4)                        | 176.7 (32.7)                 | 0.73                 | 198.7 (46.7)               | 216.0 (45.1)                | 0.01                 | 211.0 (50.7)               | 226.5 (39.6)                | 0.02                 |
| High density lipoprotein, mg/dL             | 56.9 (16.5)                         | 58.9 (17.4)                  | 0.10                 | 48.9 (18.1)                | 45.2(10.4)                  | 0.07                 | 42.3 (10.5)                | 49.7(13.2)                  | <0.001               |
| Low density lipoprotein, mg/dL              | 99.6 (25.7)                         | 101.1 (27.8)                 | 0.41                 | 112.2 (36.7)               | 135.5 (40.6)                | <0.001               | 119.1 (46.0)               | 145.0 (35.5)                | <0.001               |
| Triglyceride, mg/dL                         | 106.0 (50.7)                        | 76.8 (35.5)                  | <0.001               | 201.0 (156.1)              | 173.5 (78.0)                | 0.15                 | 265.1 (174.7)              | 166.0 (74.0)                | 0.001                |
| Blood glucose, mg/dL                        | 85.4 (16.7)                         | 97.7 (10.5)                  | <0.001               | 91.7 (36.7)                | 109.4 (42.4)                | 0.001                | 108.2 (45.1)               | 118.9 (36.8)                | 0.054                |
| Hemoglobin A1c%                             | 5.4 (0.4)                           | 5.2 (0.4)                    | <0.001               | 5.6 (0.81)                 | 5.6 (1.2)                   | 0.54                 | 6.3 (1.50)                 | 5.9 (1.1)                   | 0.24                 |

\* Mean value (standard deviation) unless otherwise noted

<sup>†</sup> Numbers sum to greater than 571 and 345 for CSS and NHANES, respectively, as some individuals had both at least one underdiagnosed condition and at least one undertreated condition

<sup>‡</sup> Adjusted for sex, current age, and race/ethnicity

<sup>§</sup> Males ≥102 cm or females ≥88 cm

**TABLE S4. Distribution of underdiagnosed and undertreated conditions among childhood cancer survivors.**

| <b>No. under-diagnosed conditions</b> | <b>No. undertreated conditions</b> |            |           |          | <b>Total</b> |
|---------------------------------------|------------------------------------|------------|-----------|----------|--------------|
|                                       | <b>0</b>                           | <b>1</b>   | <b>2</b>  | <b>3</b> |              |
| 0                                     | 323                                | 79         | 13        | 1        | 416          |
| 1                                     | 111                                | 26         | 1         | 0        | 138          |
| 2                                     | 16                                 | 0          | 0         | 0        | 16           |
| 3                                     | 1                                  | 0          | 0         | 0        | 1            |
| <b>Total</b>                          | <b>451</b>                         | <b>105</b> | <b>14</b> | <b>1</b> | <b>571</b>   |

**TABLE S5. Odds of cardiovascular disease risk factor undertreatment among childhood cancer survivors, adjusted for sex, race/ethnicity, current age, chest radiotherapy, adverse lifestyle factors, body mass index, self-efficacy, and MHLC scales.**

| Characteristic                                         | Undertreatment<br>N=120* |         |
|--------------------------------------------------------|--------------------------|---------|
|                                                        | OR (95% CI)              | P-value |
| Male vs. female (ref)                                  | 1.5 (0.9-2.5)            | 0.11    |
| Other vs. non-Hispanic White (ref)                     | 1.5 (0.9-2.5)            | 0.11    |
| Current age, years <sup>†</sup>                        | 1.4 (1.0-1.9)            | 0.04    |
| Chest radiotherapy exposure vs. none (ref)             | 2.0 (1.2-3.4)            | 0.009   |
| No. adverse lifestyle factors <sup>‡</sup>             |                          |         |
| 0                                                      | 1.0 (ref)                |         |
| 1                                                      | 1.4 (0.7-2.8)            | 0.38    |
| ≥2                                                     | 1.9 (0.9-4.2)            | 0.10    |
| Body mass index, kg/m <sup>2</sup>                     |                          |         |
| <25                                                    | 1.0 (ref)                |         |
| 25-29                                                  | 1.9 (1.0-3.6)            | 0.06    |
| ≥30                                                    | 3.1 (1.7-5.8)            | <.001   |
| High vs. low health-related self-efficacy <sup>§</sup> | 0.5 (0.3-1.0)            | 0.03    |
| MHLC Scale <sup>  </sup>                               |                          |         |
| Internal                                               | 0.6 (0.4-0.9)            | 0.03    |
| Chance                                                 | 0.8 (0.6-1.2)            | 0.25    |
| Powerful others                                        | 1.7 (1.2-2.5)            | 0.005   |

CI, confidence interval; MHLC, Multidimensional Health Locus of Control; OR, odds ratio; ref, referent

\* Compared with survivors without any cardiovascular disease risk factor underdiagnosis and undertreatment (n=323; referent)

<sup>†</sup> Modeled as a linear term with the following categories: 20-34, 35-39, and ≥40 years

<sup>‡</sup> Consisting of physical inactivity, low fruit/vegetable consumption, and current smoking/tobacco use

<sup>§</sup> Defined as T-score ≥50 vs. <50 (ref)

<sup>||</sup> Modeled as a linear term with risk estimates reflecting the association with a one unit increase in the scale value
